# Supplementary material for: A miniaturized push–pull-perfusion probe for few-second sampling of neurotransmitters in the mouse brain
Source: Royal Society of Chemistry journal article supplement (doi:10.1039/c8lc01137k), 2019-01-01
Supplement: c8lc01137k1.pdf [file c8lc01137k1.pdf]

## Supporting information

S1 Pressure and flow in the  $\mu$ PPPS probe

Operation of the  $\mu$ PPPS probe requires careful tuning of the inlet flow rates and outlet pressure in order to achieve a decent recovery rate without disturbing the brain environment with significant convection. The various microchannels and connecting capillaries are collected in an equivalent electrical circuit. From this, a transfer function is determined which can be plotted as a function of various input flow rates and pressures.

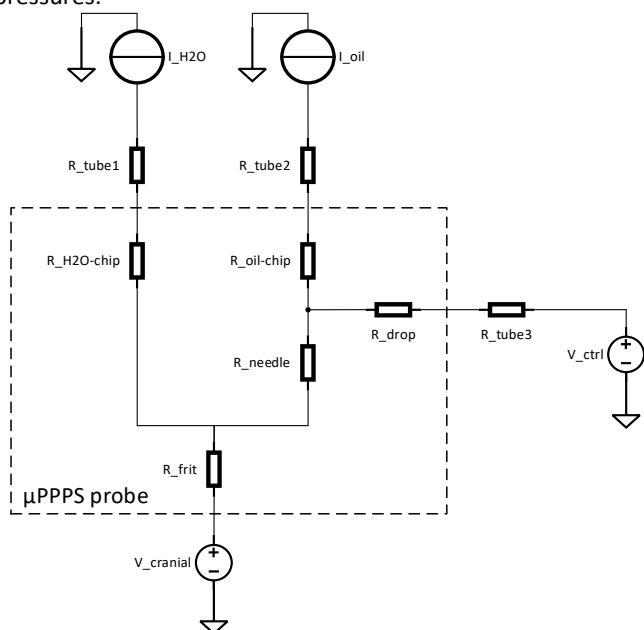

**Figure S1A.** Electrical equivalent circuit of the hydraulic resistance and pressure of the microfluidic channel network of the  $\mu$ PPPS probe.

With the component values as given in table S1B. Now, the outlet flow rate and the sampling flow through the sampling channels can be calculated:

$$I_{out} = \frac{V_{cranial} - V_{ctrl} + I_{H2O}R_{frit} + I_{oil}(R_{frit} + R_{needle})}{R_{frit} + R_{needle} + R_{drop} + R_{tube3}}$$

$I_{sample}$

$$= \frac{V_{cranial} - V_{ctrl} - I_{H2O}(R_{needle} + R_{drop} + R_{tube3}) - I_{oil}(R_{drop} + R_{tube3})}{R_{frit} + R_{needle} + R_{drop} + R_{tube3}}$$

The component values are listed in table S1B. Using the equations and data from table S1.1, the inward flow rate through the probe tip ( $I_{sample}$ ) and total outflow ( $I_{out}$ ) can be calculated (see figure S1C). From this, an estimation can be made for the desired outlet pressure.

**Table S1B.** Component values related to the electrical equivalent circuit of the  $\mu$ PPPS probe.

| Component      | Value                                                  | Explanation                                                                                                         |
|----------------|--------------------------------------------------------|---------------------------------------------------------------------------------------------------------------------|
| $I_{H2O}$      | $8.3 \cdot 10^{-13} \text{ m}^3/\text{s}$              | Flow rate of water ( <i>in vitro</i> ) or perfusion fluid ( <i>in vivo</i> )                                        |
| $I_{oil}$      | $3.3 \cdot 10^{-12} \text{ m}^3/\text{s}$              | Flow rate of decane                                                                                                 |
| $V_{ctrl}$     | $-8 \cdot 10^4 \text{ Pa}$                             | Pressure at the outlet                                                                                              |
| $V_{cranial}$  | 0 Pa                                                   | Cranial pressure ( <i>in vivo</i> , set to 0 Pa for <i>in vitro</i> )                                               |
| $R_{tube1}$    | $1.1 \cdot 10^{15} \text{ Pa}\cdot\text{s}/\text{m}^3$ | Total hydraulic resistance of inlet tubing for water                                                                |
| $R_{tube2}$    | $1.2 \cdot 10^{15} \text{ Pa}\cdot\text{s}/\text{m}^3$ | Total hydraulic resistance of inlet tubing for <i>n</i> -decane                                                     |
| $R_{tube3}$    | $1.2 \cdot 10^{15} \text{ Pa}\cdot\text{s}/\text{m}^3$ | Total hydraulic resistance of outlet tubing for water droplets in <i>n</i> -decane, assuming a 50%/50% volume ratio |
| $R_{H2O-chip}$ | $1.8 \cdot 10^{15} \text{ Pa}\cdot\text{s}/\text{m}^3$ | Hydraulic resistance of microchannel for water infusion                                                             |
| $R_{oil-chip}$ | $8.1 \cdot 10^{15} \text{ Pa}\cdot\text{s}/\text{m}^3$ | Hydraulic resistance of microchannel for oil until droplet generator                                                |
| $R_{needle}$   | $23 \cdot 10^{15} \text{ Pa}\cdot\text{s}/\text{m}^3$  | Hydraulic resistance of microchannel for sampling until droplet generator                                           |
| $R_{frit}$     | $25 \cdot 10^{12} \text{ Pa}\cdot\text{s}/\text{m}^3$  | Hydraulic resistance of sampling channel array                                                                      |
| $R_{drop}$     | $7.2 \cdot 10^{14} \text{ Pa}\cdot\text{s}/\text{m}^3$ | Hydraulic resistance of microchannel for droplet transport to outlet                                                |

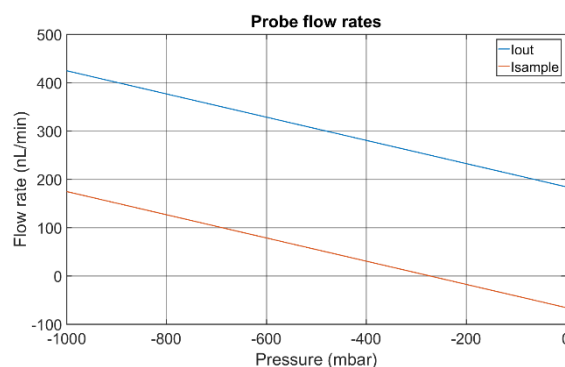

**Figure S1C.** Calculated flow rates through the outlet capillary ( $I_{out}$ ) and through the sampling channels in the probe tip ( $I_{sample}$ ). Set flow rates are  $I_{H2O}=50 \text{ nL}/\text{min}$  and  $I_{oil}=200 \text{ nL}/\text{min}$ .

## Lab on Chip

## ARTICLE

## S2 Optical setup

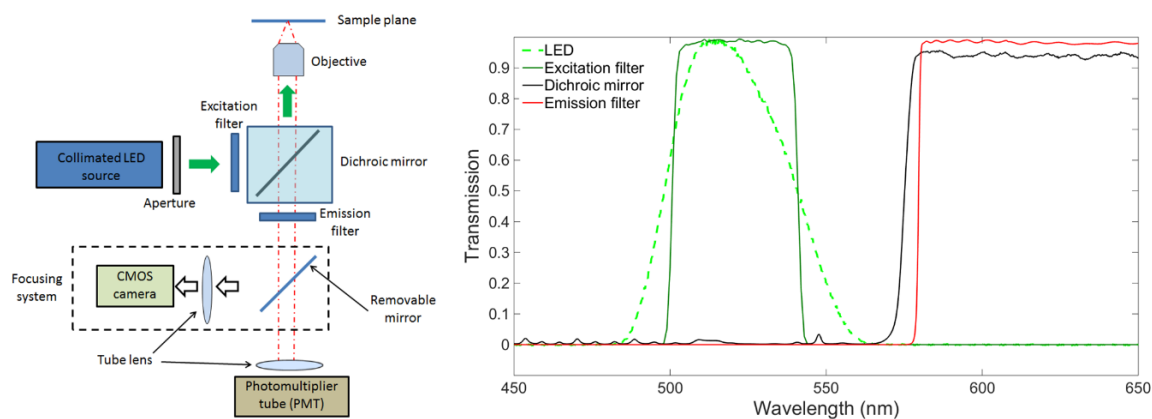

**Figure S2A.** Schematic representation of the optical setup designed for the fluorescence measurements. Resorufin has excitation and emission maxima of 571 and 585 nm, respectively.

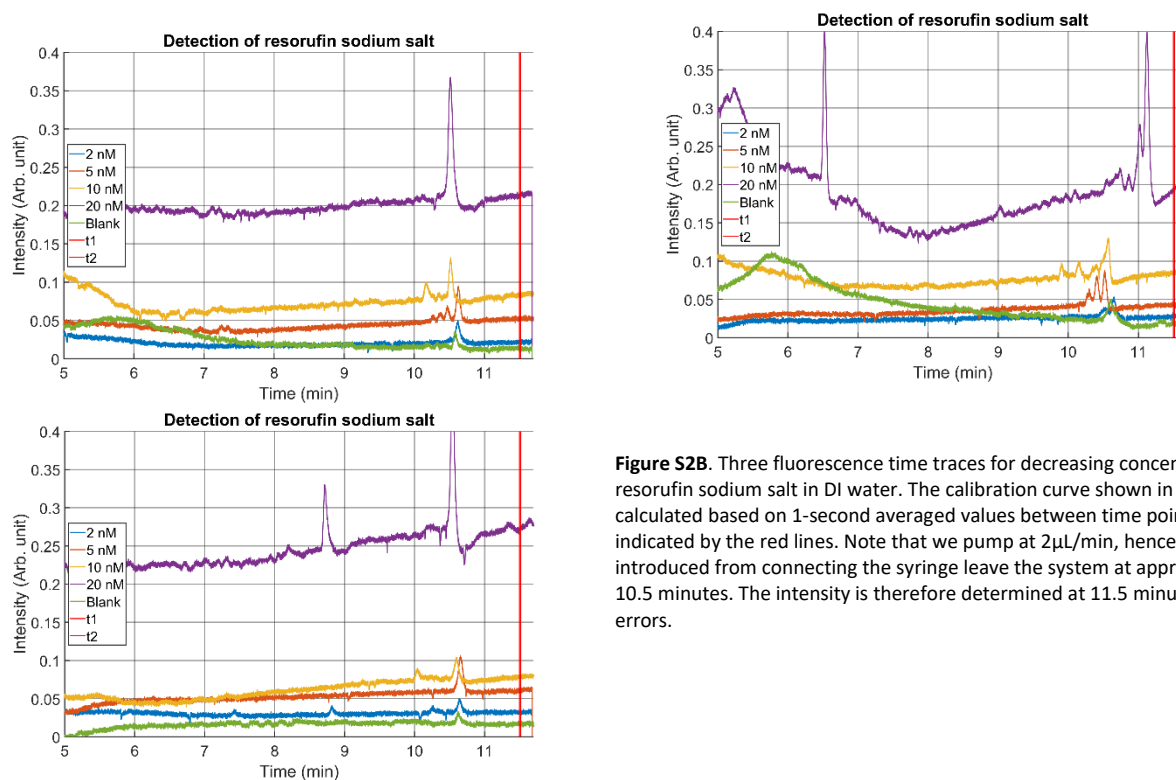

**Figure S2B.** Three fluorescence time traces for decreasing concentrations of resorufin sodium salt in DI water. The calibration curve shown in figure 6 is calculated based on 1-second averaged values between time points t1 and t2 indicated by the red lines. Note that we pump at  $2\mu\text{L}/\text{min}$ , hence air bubbles introduced from connecting the syringe leave the system at approximately 10.5 minutes. The intensity is therefore determined at 11.5 minutes to avoid errors.

## Lab on Chip

## ARTICLE

S3 *In vitro* fluorescein sensing experiments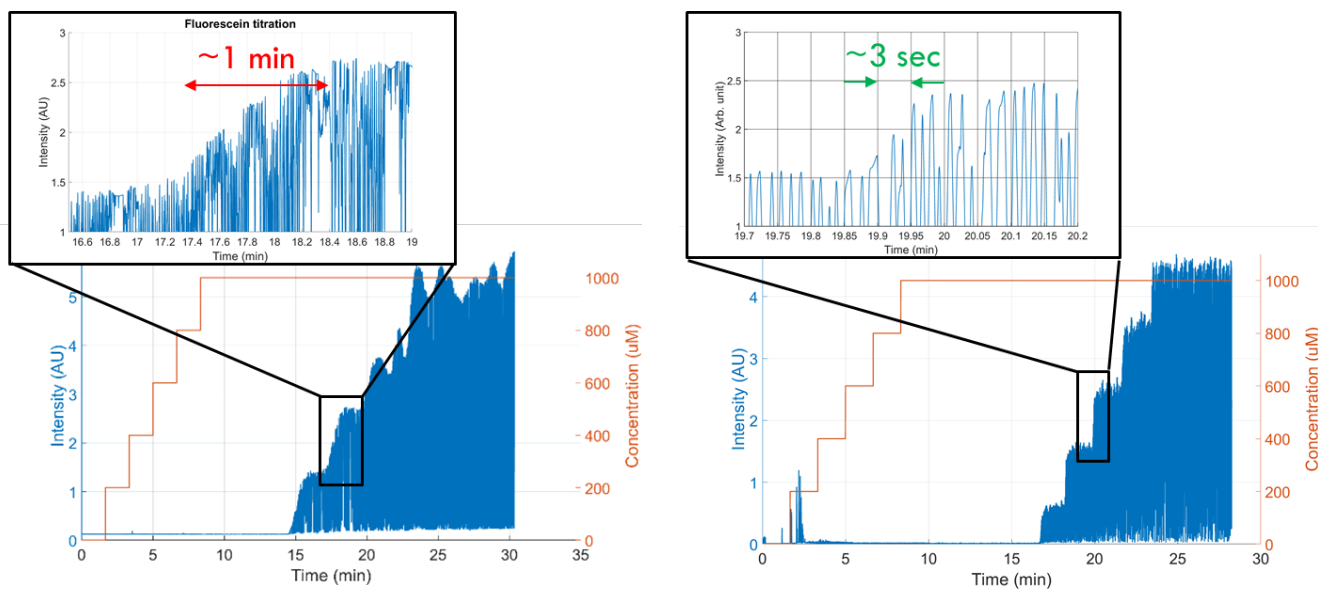

**Figure S3A.** Comparison of the obtained temporal resolution of probe type 1, using fluorescein titration with (right) and without (left) droplet merging. Due to dispersion of the small droplets, the temporal resolution reduces down to 1 minute, while merging the droplets enhances the temporal resolution to approximately 3 seconds.

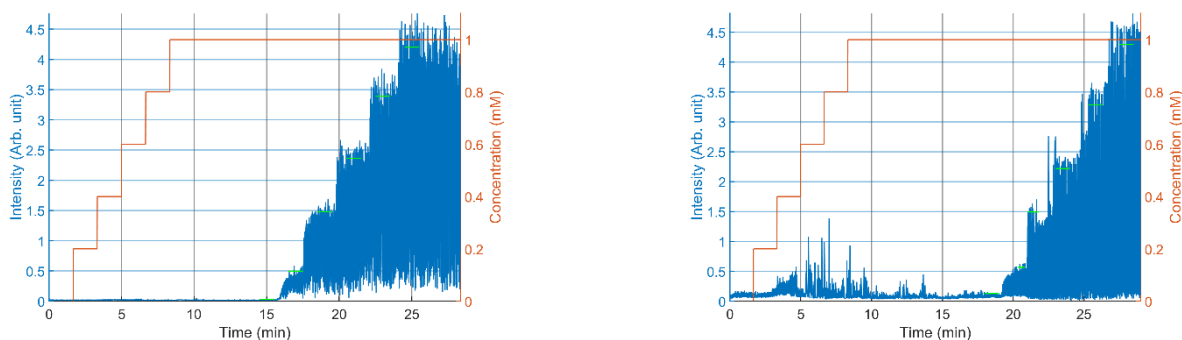

**Figure S3B.** Additional repeats of the Fluorescein titration experiments.

**S4 Additional *In vitro* glutamate sensing experiments**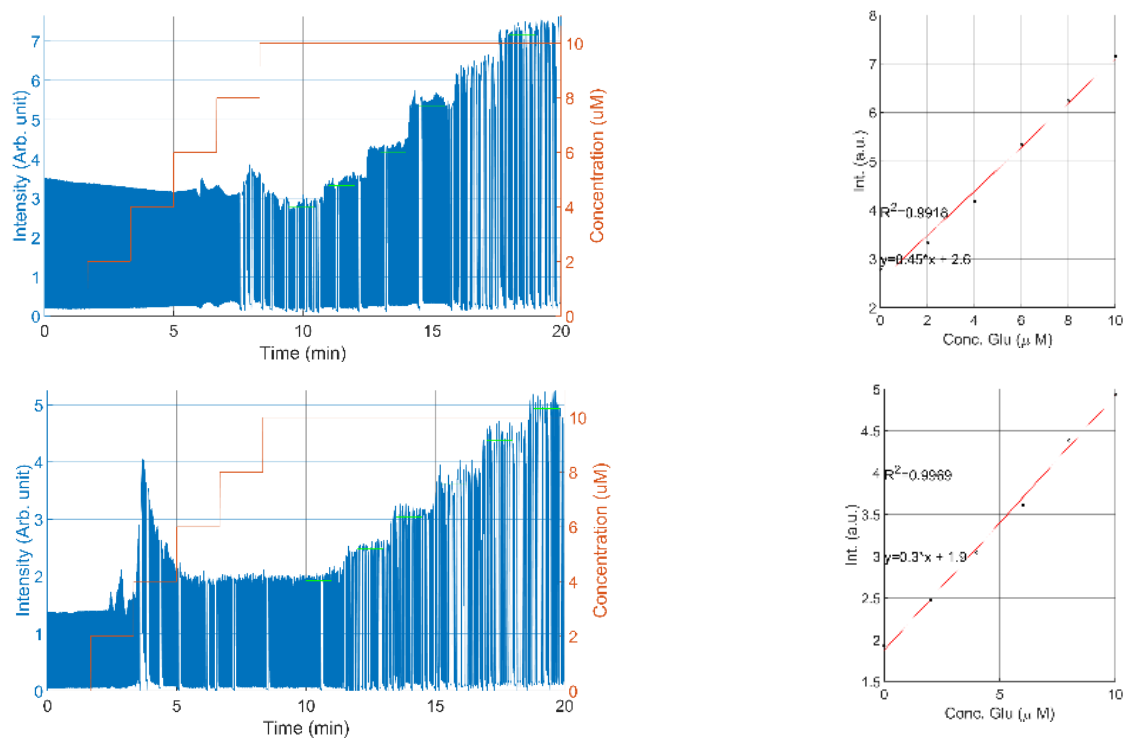

**Figure S4.** Additional repeats of the Glutamate titration experiments, indicating reproducible behaviour with different sensitivity (0.45 and 0.3 a.u./µM, respectively).

### S5 *In vivo* glutamate sensing experiments

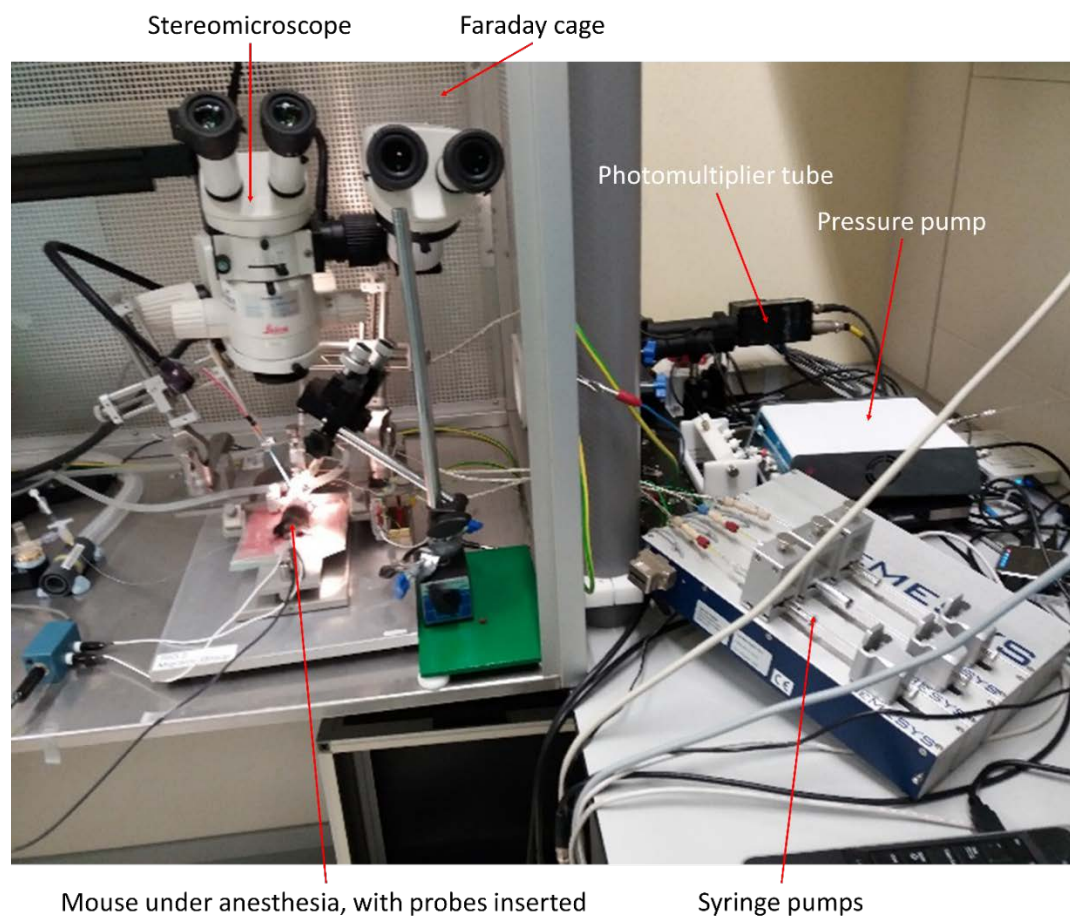

**Figure S5A.** Setup for *in vivo* glutamate measurements. Various pieces of equipment used are indicated. See figure S5B for details on the placement of the  $\mu$ PPPS probe and other electrodes in the mouse brain.

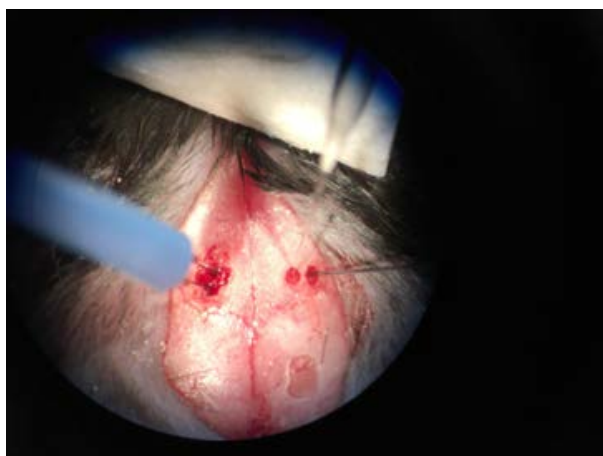

**Figure S5B.** Image obtained through the stereomicroscope showing the surgical set-up used for the *in vivo*  $\mu$ PPPS measurements in an anesthetized mouse. Shown is the mouse skull overlying the cortex, with the craniotomies for (from left to right) electrical stimulation, DC glass recording, and  $\mu$ PPPS probe. More details can be found in figure 7 and the corresponding text.

## S6 Process flow of the probe fabrication

| Step | Process                                          | Parameters                                                                                                  |                                                                                      |
|------|--------------------------------------------------|-------------------------------------------------------------------------------------------------------------|--------------------------------------------------------------------------------------|
| 1    | Wafer selection & cleaning                       | p-type <1-0-0> 5-10 $\Omega$ *cm OneSide Polished, 525 $\mu$ m thickness.                                   | 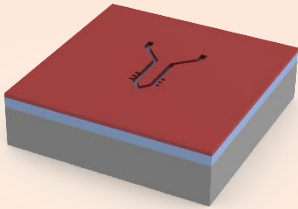   |
| 2    | Thermal oxidation                                | oven B2 – wet 1150;<br>20 min 1150 °C wet oxidation – ~450 nm                                               |                                                                                      |
| 3    | Photolithography<br>Mask 1 IW – fluidic channels | WB21 - st. OiR907-12 with HMDS, 4 s. exposure <check sampling channels, optically>                          |                                                                                      |
| 4    | SiO <sub>2</sub> buried mask etching             | AdixenDE – SiO <sub>2</sub> STD; etchrate is load dependent : ~400 nm/min. @ 80% load; 1:30 min.            |    |
| 5    | Resist strip                                     | Tepla 360M – recipe 011; load dependent 20 min.; check carrier masking, repeat if necessary                 |   |
| 6    | Photolithography<br>Mask 2 IB – Needles & inlets | WB21 – 3000 rpm OiR907-17 with HMDS, 6 s. exposure <check alignment, after development>                     |  |
| 7    | Remove SiO <sub>2</sub>                          | AdixenDE – SiO <sub>2</sub> STD; etchrate is load dependent : ~400 nm/min. @ 80% load; 1:30 min.            |  |
| 8    | DRIE – 120 $\mu$ m<br>Needles & inlets           | SPTS Pegasus; Si etch st. etchrate is load dependent: ~20 $\mu$ m/min.; 6 min., check depth, add extra time |  |
| 9    | Resist strip                                     | Tepla 360M – recipe 035; load dependent 20 min.; repeat if necessary                                        |  |

|     |                                             |                                                                                                                                                                                                                                       |                                                                                      |
|-----|---------------------------------------------|---------------------------------------------------------------------------------------------------------------------------------------------------------------------------------------------------------------------------------------|--------------------------------------------------------------------------------------|
| 10  | DRIE – 20 $\mu\text{m}$<br>Fluidic channels | SPTS Pegasus; HARS<br>Etch rate is load dependent:<br>$\sim 10 \mu\text{m}/\text{min}$ ; 2 min., check depth, add extra time                                                                                                          | 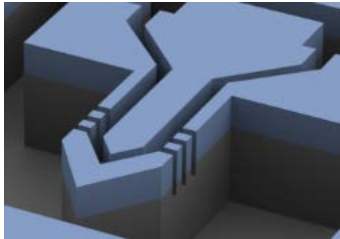   |
| 11a | FC removal I<br>oxygen plasma               | TEtske: 100 mT / 25 W, 50 sccm $\text{O}_2$ / 10 sccm $\text{N}_2$ ; $\sim 1$ min.                                                                                                                                                    |                                                                                      |
| 11b | FC removal II<br>Piranha                    | $\text{H}_2\text{SO}_4/\text{H}_2\text{O}_2$ 2:1 op 110 $^\circ\text{C}$ ; $\sim 10$ min.                                                                                                                                             |                                                                                      |
| 12  | Buried mask strip                           | WB6 – BHF;<br>$\sim 7$ min., until full hydrophobicity                                                                                                                                                                                |    |
| 13  | Pre-furnace cleaning                        | standard cleaning WB14 + 1 min 1% HF dip                                                                                                                                                                                              |                                                                                      |
| 14  | Oxidation<br>450 nm                         | furnace B2: 20 min. program Wet 1150B                                                                                                                                                                                                 |   |
| 15  | Anodic bonding                              | MEMpax® glass wafer, 500 $\mu\text{m}$ thickness.<br>Anodic Bonder EV-501 – st. program- <b>no vacuum</b> (Elizaveta-no-vac)<br>3 min. 400 V, 3 min. 600 V, 3 min. 800 V, 10 min. 1000 V                                              |  |
| 16  | Back Etching                                | WB10 – 25% HF, etch rate $\sim 1 \mu\text{m}/\text{min}$ ; temperature and freshness dependent<br>Wafer thickness measurement: Heidehain etch/measure/etch; $\sim 480$ min. After 240 min. turn wafers 180° to reduce non-uniformity. |                                                                                      |
| 17  | Polishing (CMP)                             | Cemapol; 240 s. standard chemical mechanical polishing                                                                                                                                                                                |  |

|    |                                                   |                                                                                                                                                                                                                    |                                                                                                                                                                                                                                                                               |
|----|---------------------------------------------------|--------------------------------------------------------------------------------------------------------------------------------------------------------------------------------------------------------------------|-------------------------------------------------------------------------------------------------------------------------------------------------------------------------------------------------------------------------------------------------------------------------------|
| 15 | Lithography<br>Mask 3 IW -<br>electrodes          | WB21 - st. OiR907-17 with vapour phase<br>HMDS<br><check alignment, after development>                                                                                                                             | <p>Please note that these steps have not been carried out in practice, but indicate that it would be relatively easy to add electrodes to the glass cover of the shaft of the probe.<br/>A similar process has been demonstrated previously as described in <sup>23</sup></p> |
| 16 | Recess etch                                       | WB10 – 6 min. BHF @ RT                                                                                                                                                                                             |                                                                                                                                                                                                                                                                               |
| 17 | Sputtering<br>10/125/10nm<br>Ta/Pt/Ta             | Sputterke – 110 sccm Ar, 200W<br>45 s. 150 W Ta, 5 min 20 s. 200 W Pt, 45<br>s. 150 W Ta                                                                                                                           |                                                                                                                                                                                                                                                                               |
| 18 | Lift-off                                          | WB11 – beaker acetone<br>20 s. ultrasonic, soak until complete<br>delamination (few hours), ultrasonic in new<br>acetone for 2 min., rinse with acetone resp.<br>IPA (spray bottle). Do not let dry in<br>between. |                                                                                                                                                                                                                                                                               |
| 19 | Cleaning                                          | WB6 – fuming HNO <sub>3</sub><br>remove residues of the lift-off; 5 min.                                                                                                                                           |                                                                                                                                                                                                                                                                               |
| 20 | PECVD ONO                                         | Oxford 80 – Bios JB ONO<br>Min.                                                                                                                                                                                    |                                                                                                                                                                                                                                                                               |
| 21 | Lithography<br>Mask 4 IW –<br>electrode pads      | WB21 - st. OiR907-17 with HMDS<br><check alignment, after development>                                                                                                                                             |                                                                                                                                                                                                                                                                               |
| 22 | ONO + Ta etch                                     |                                                                                                                                                                                                                    |                                                                                                                                                                                                                                                                               |
| 23 | Resist strip                                      | Tepla 360M – recipe 012; load dependent<br>30 min.; repeat if necessary                                                                                                                                            |                                                                                                                                                                                                                                                                               |
| 24 | Lithography<br>Mask 5 IB mirror<br>- Needle body  | WB21 – 2000 rpm OiR907-17 with HMDS                                                                                                                                                                                |                                                                                                                                                                                                                                                                               |
| 25 | Lithography Mask 6<br>IW –<br>Top cover clearance | WB21 – 3 times 2000 rpm OiR907-17 with<br>HMDS<br>bottom alignment, crosshair<br>3 times 15 s. interval exposure, 10 s. relax                                                                                      | 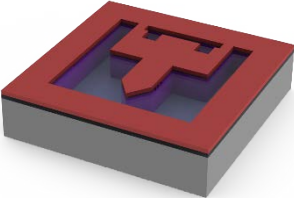                                                                                                                                                                                          |
| 26 | DRIE glass<br>Top Cover<br>Clearance              | AdixenDE program BFloatexp9<br>2 times 20 min.                                                                                                                                                                     |                                                                                                                                                                                           |
| 27 | Resist strip frontside                            | TEtske: 40mT/60W 50/20 sccm O <sub>2</sub> /N <sub>2</sub>                                                                                                                                                         |                                                                                                                                                                                                                                                                               |



|    |                                         |                                                                                                                |                                                                                    |
|----|-----------------------------------------|----------------------------------------------------------------------------------------------------------------|------------------------------------------------------------------------------------|
| 28 | DRIE 385 $\mu\text{m}$ -<br>Needle body | SPTS Pegasus; 14 min., until He leakage.<br>Too long will ruin the sampling channels<br>and needle!            | 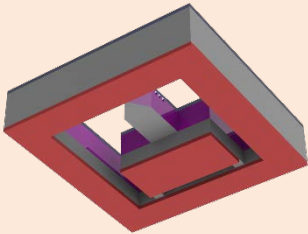 |
| 29 | RIE<br>Needle Body                      | TEtske: 100 mT/ 80W , 35/30/25 sccm<br>$\text{SF}_6/\text{O}_2/\text{CHF}_3$<br>Until all needles are cleared. |                                                                                    |
| 30 | Resist strip                            | Tepla 360M – recipe 012; load dependent<br>30 min.; repeat if necessary                                        |  |

Note: Machine names mentioned in the parameter column refer to specific equipment present in the MESA+ Nanolab cleanroom facility. A full list of equipment can be found here: <https://mesaplusnanolab.ewi.utwente.nl/mis/>
